# Supplementary material
Source: PubMed Central journal article supplement (PMC4077009)
Supplement: Supp_Fig2.pdf [file Supp_Fig2.pdf]

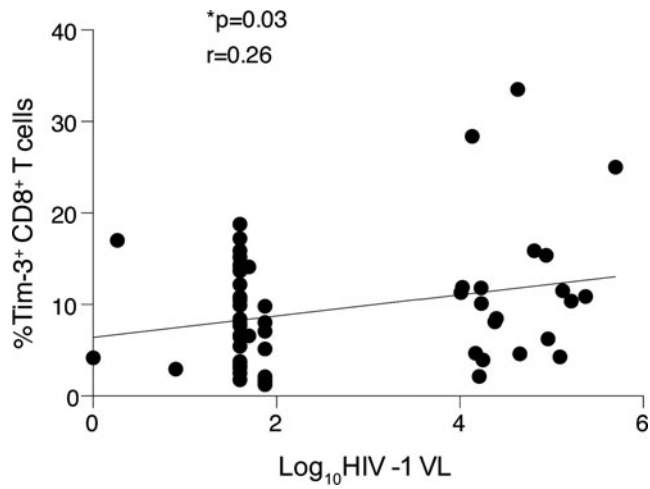

**SUPPLEMENTARY FIG. S2.** Correlation between %Tim-3<sup>+</sup>CD8<sup>+</sup> T cells and log<sub>10</sub> HIV plasma viral load. Scatterplot shows positive correlation between %Tim-3<sup>+</sup>CD8<sup>+</sup> T cells and log<sub>10</sub> HIV viral load (\**p*=0.03, Spearman *r*=0.26).
